# Supplementary material
Source: PubMed Central journal article supplement (PMC3638069)

# Supplemental Figure 1

A

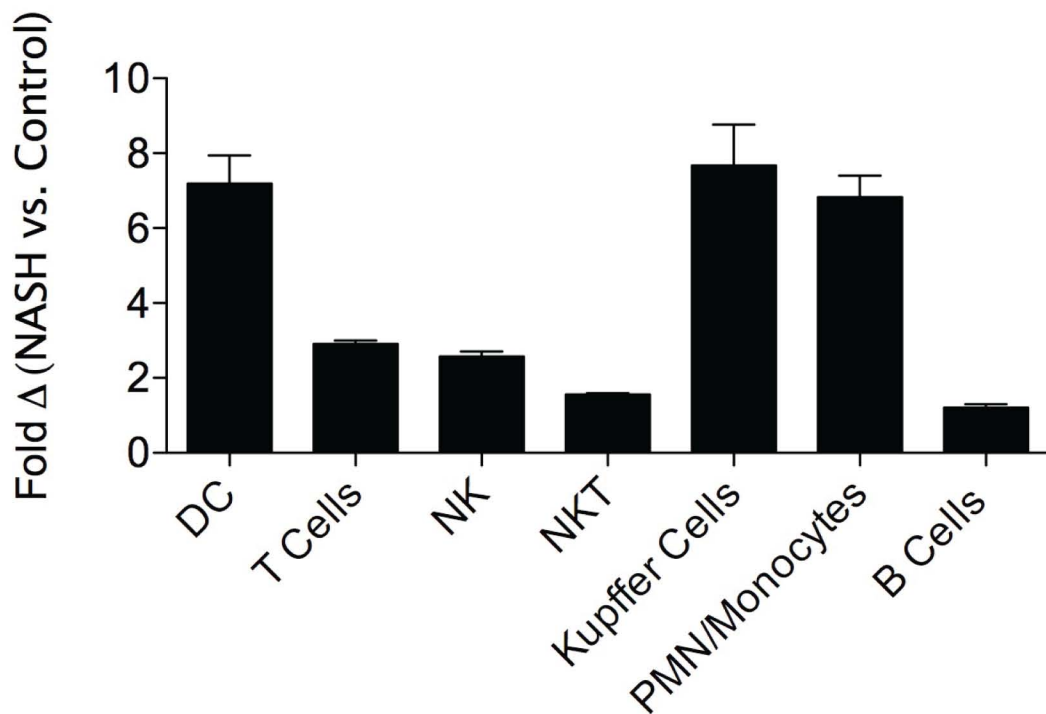

B

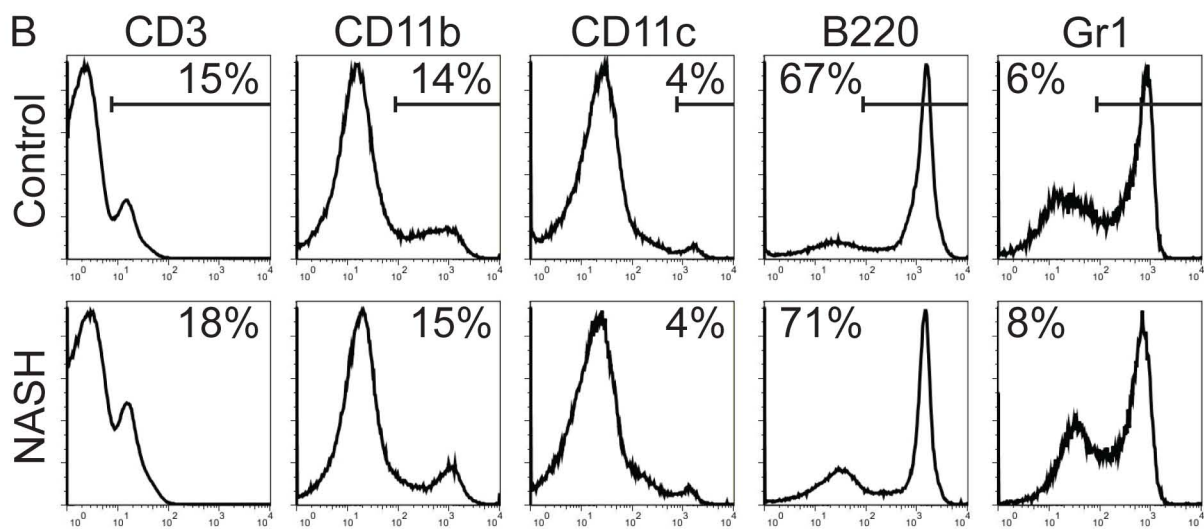

C

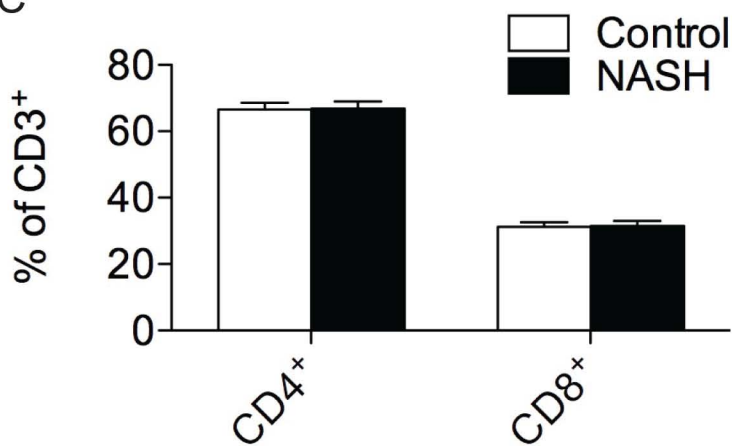

# Supplemental Figure 2

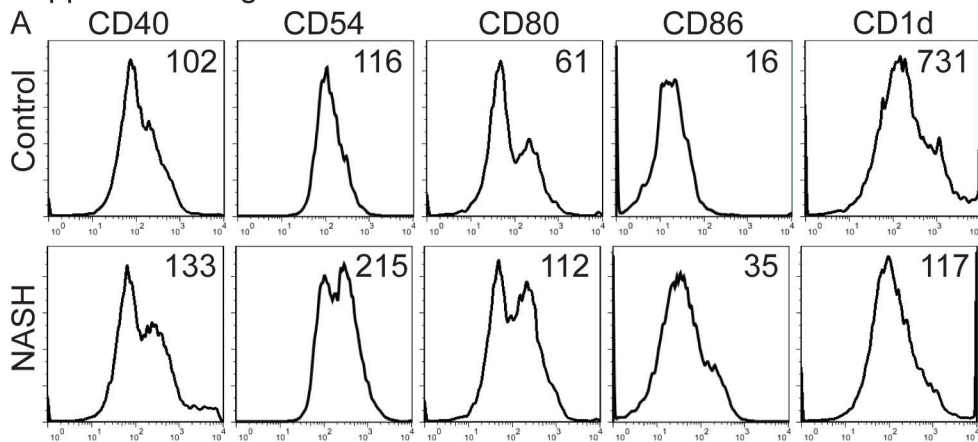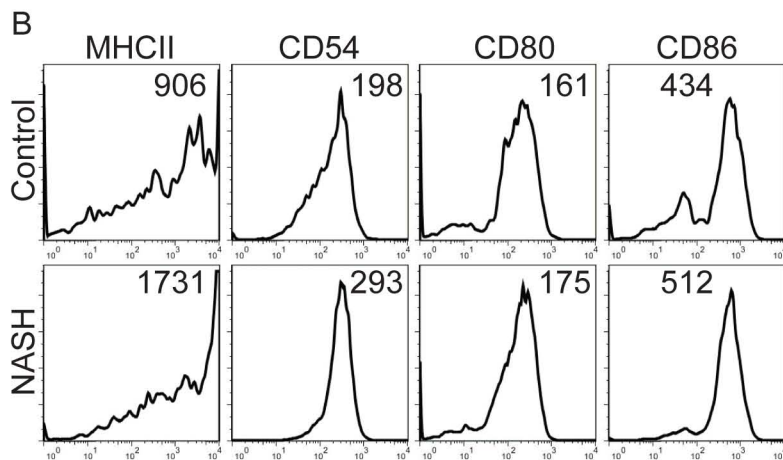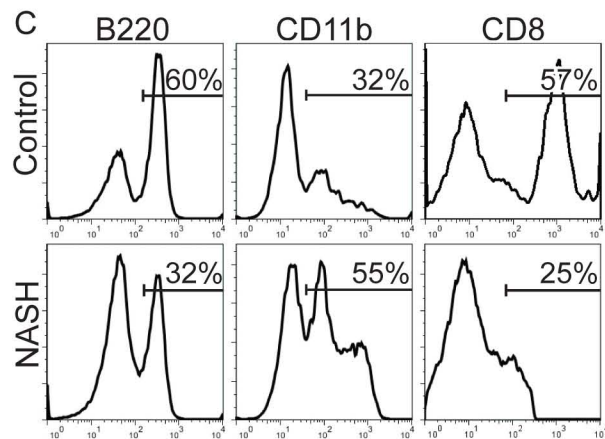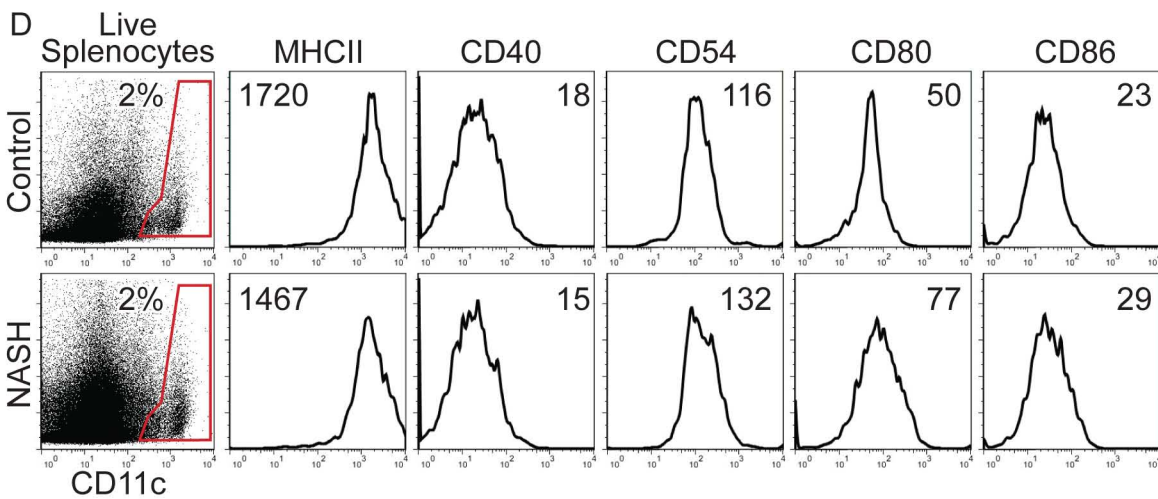

Supplemental Figure 3

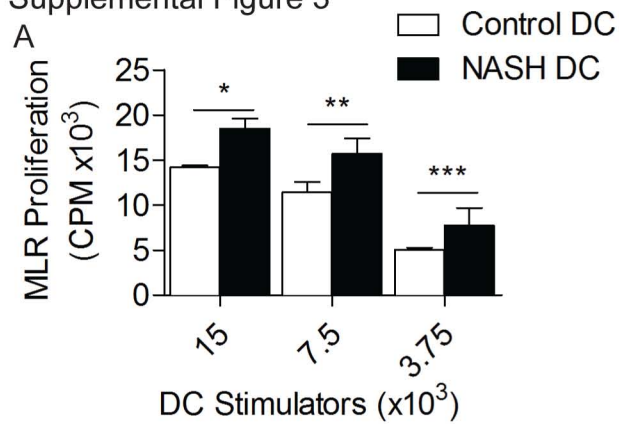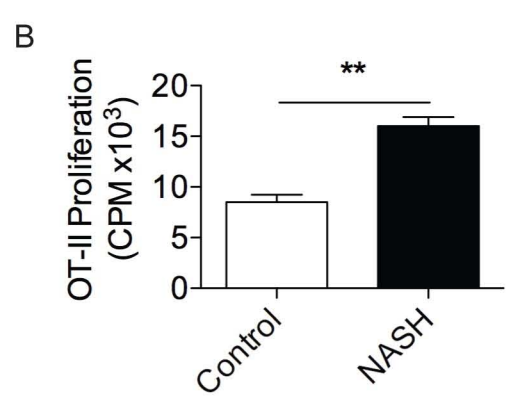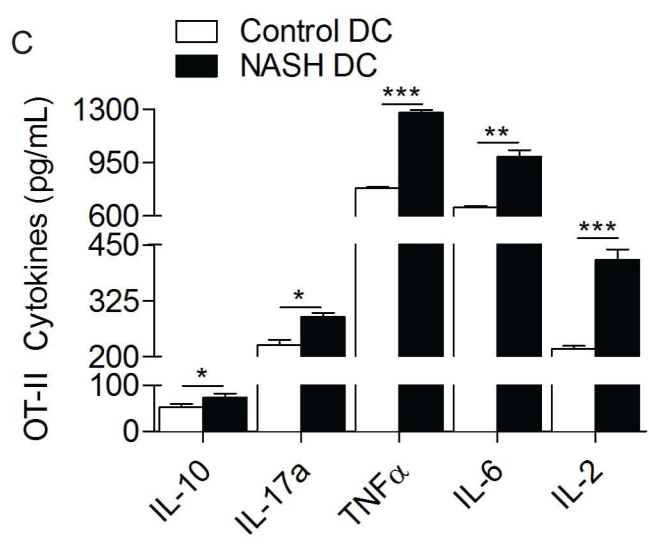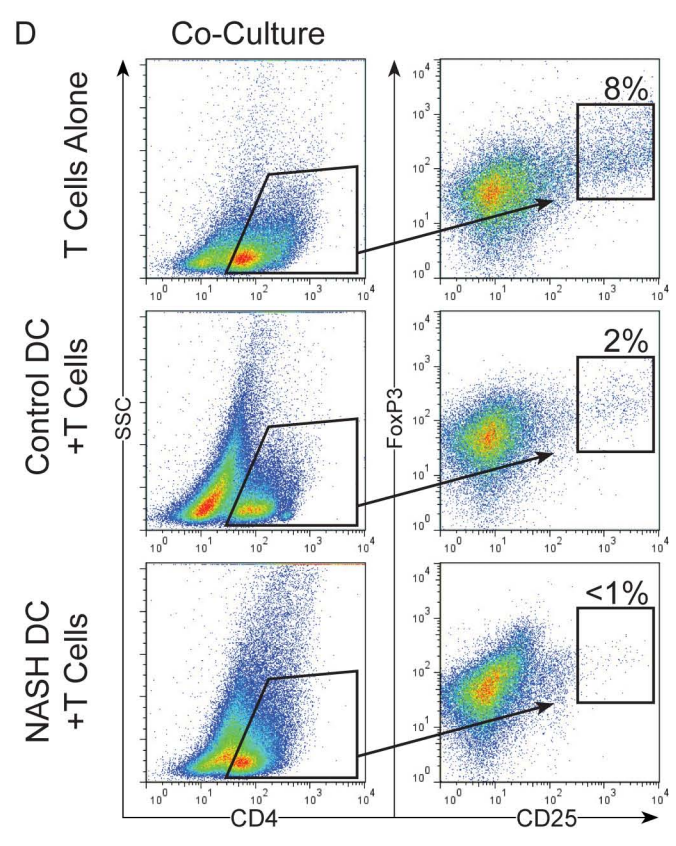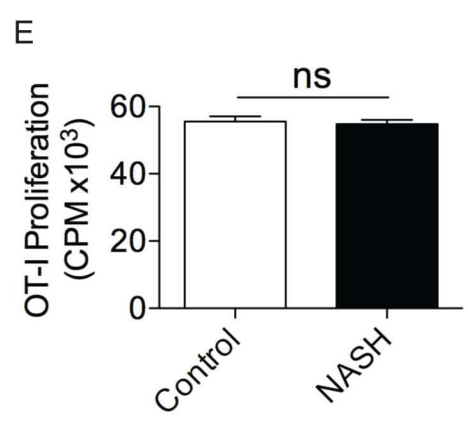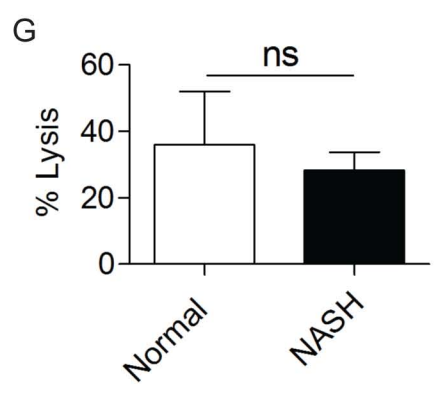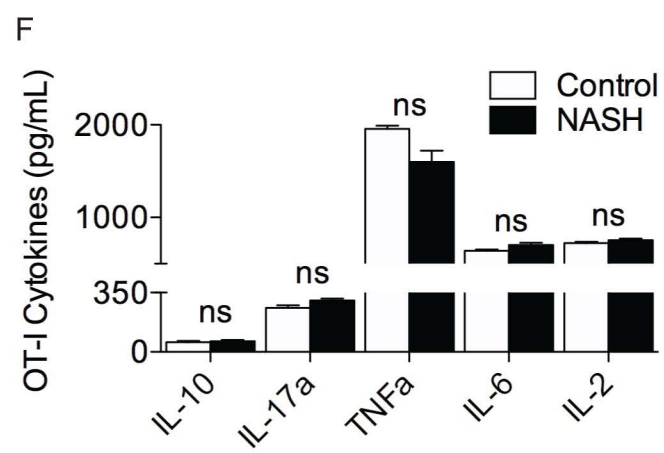

# Supplemental Figure 4

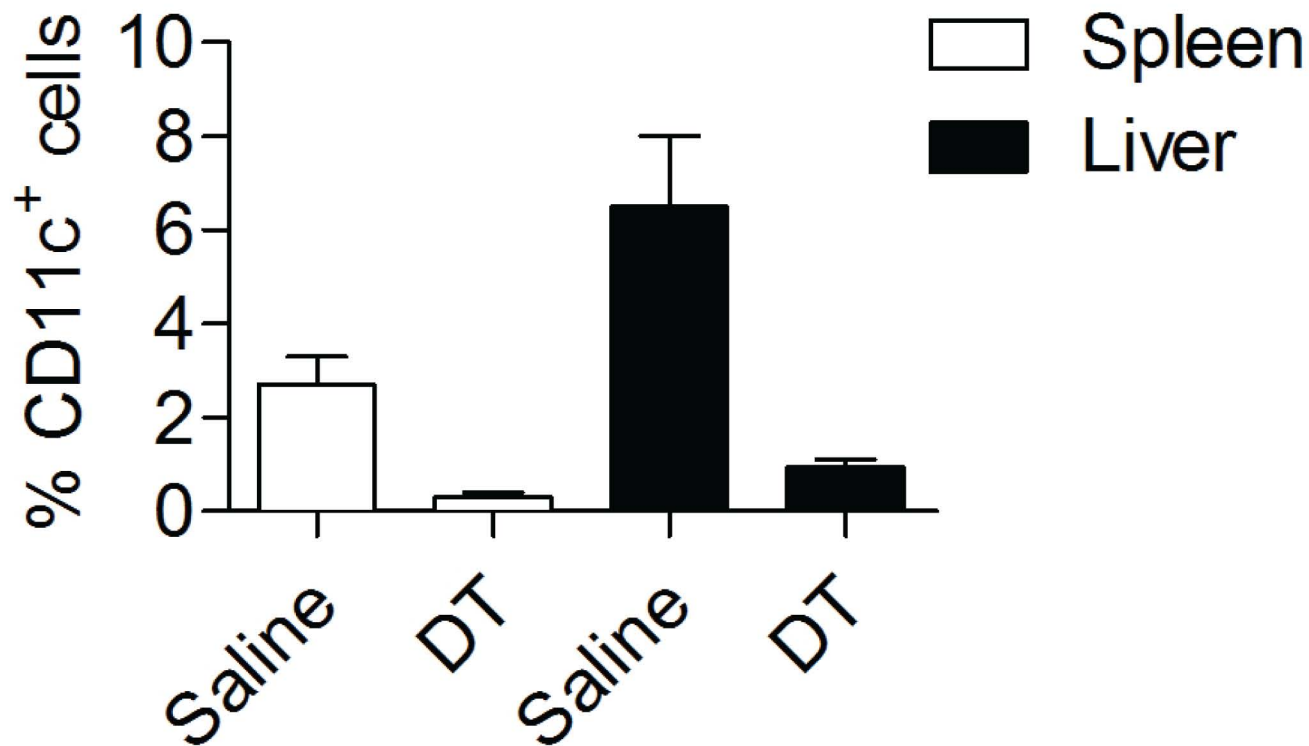

# Supplemental Figure 5

A

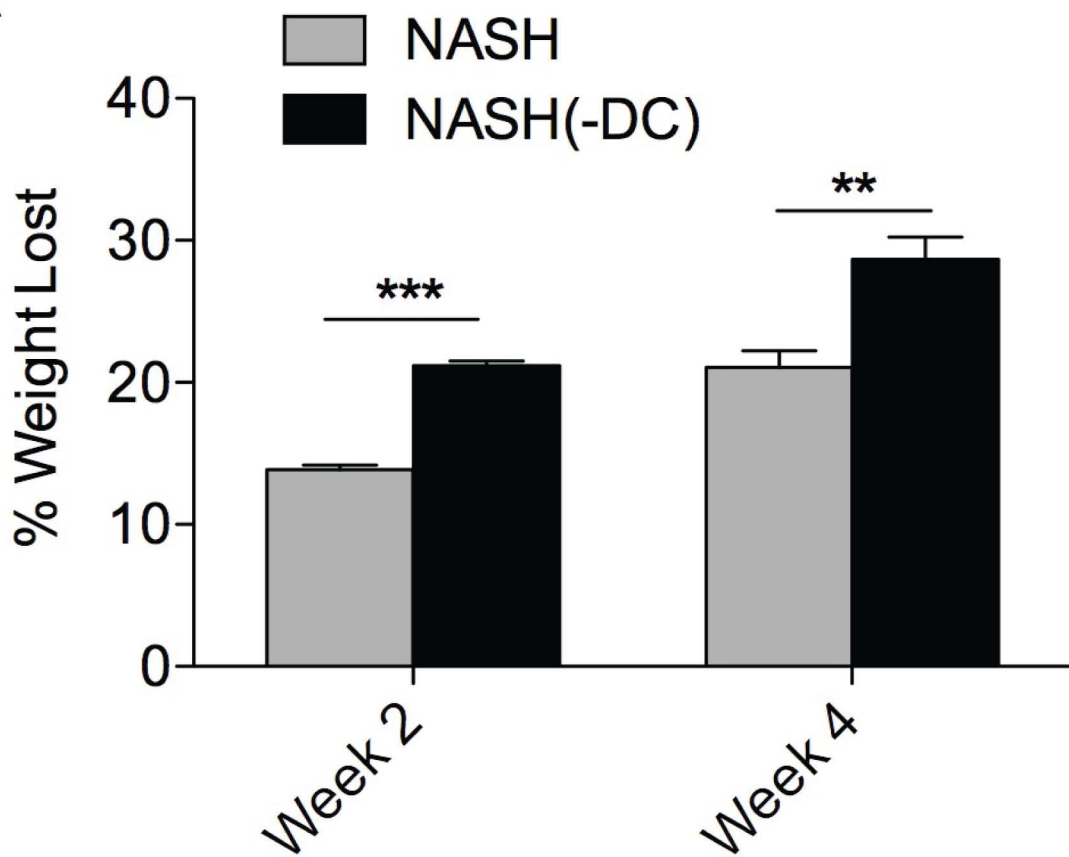

B

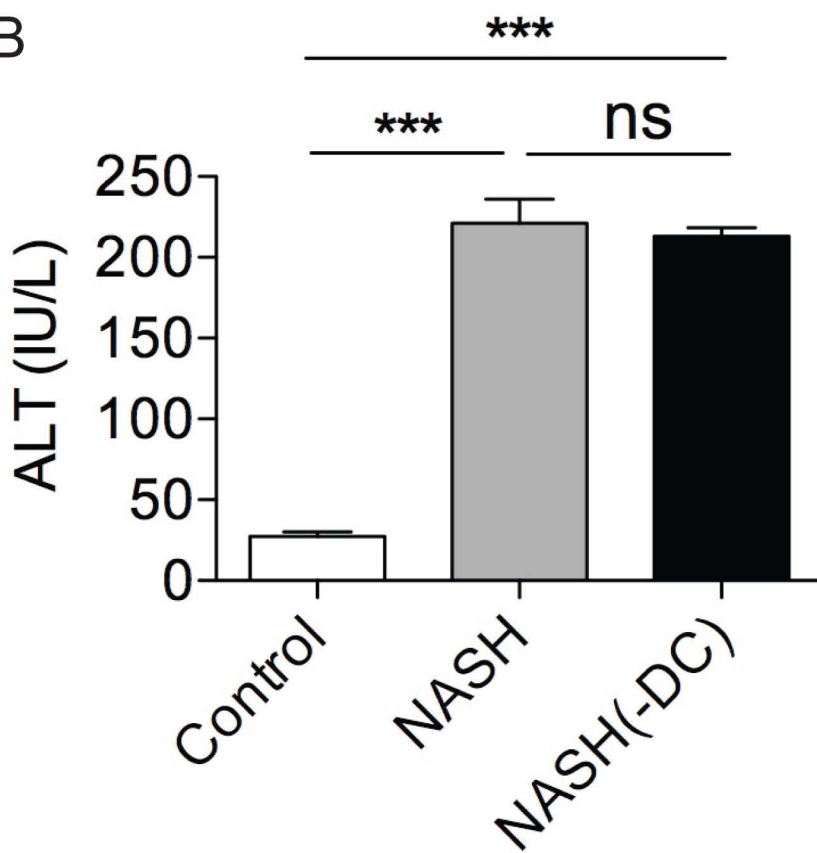

Supplemental Figure 6

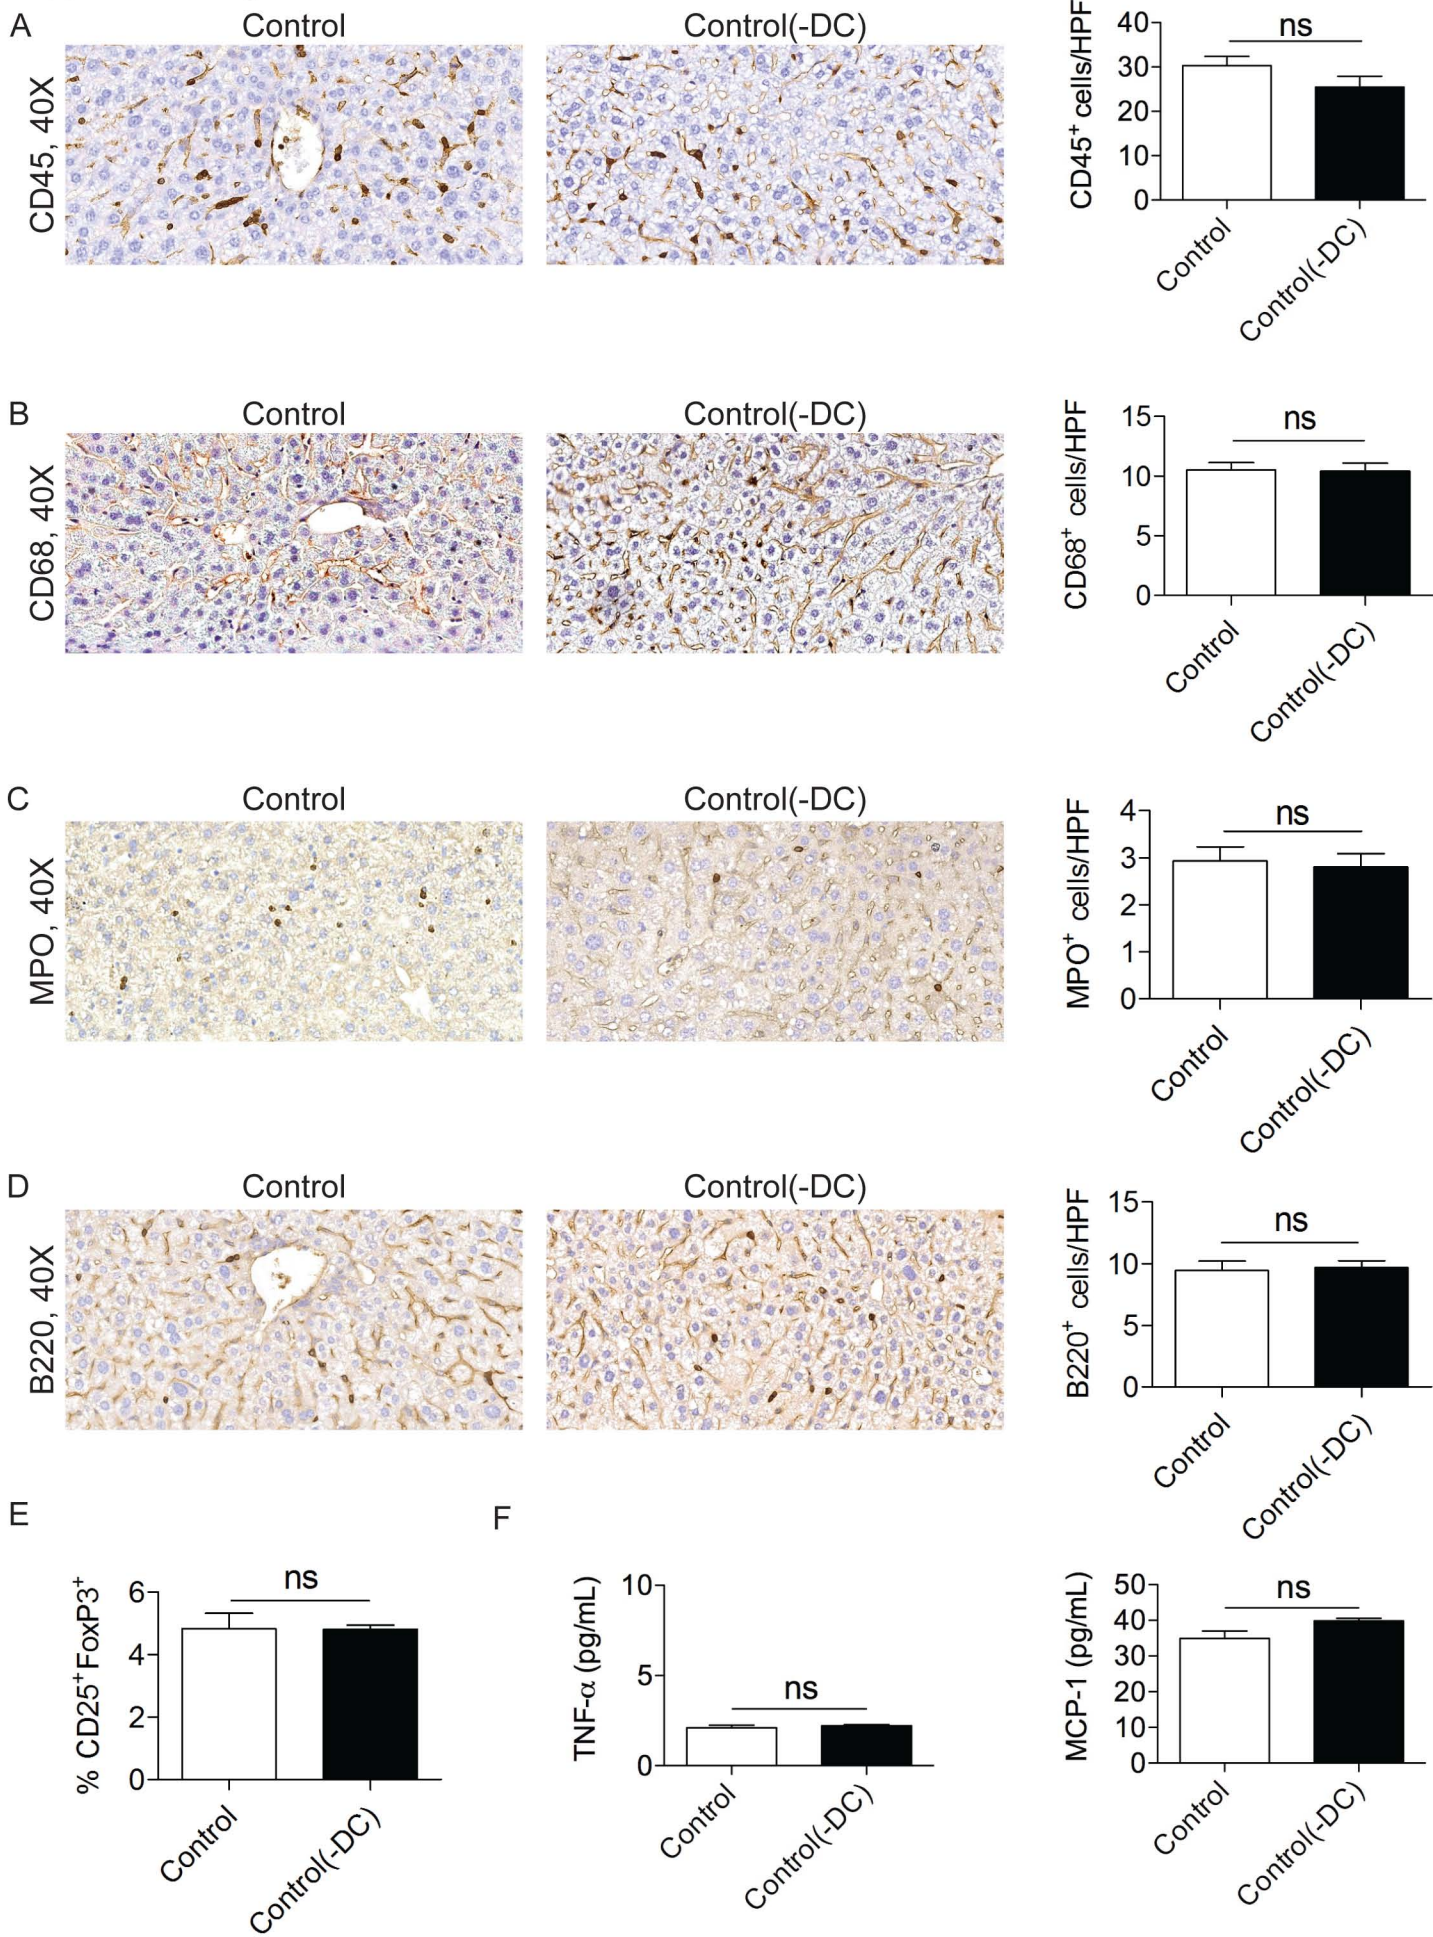

Supplemental Figure 7

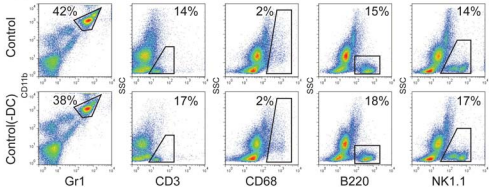

Supplemental Figure 8

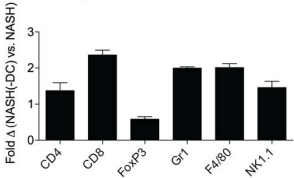



Supplemental Figure 9

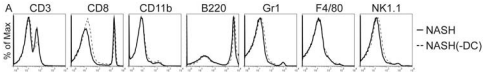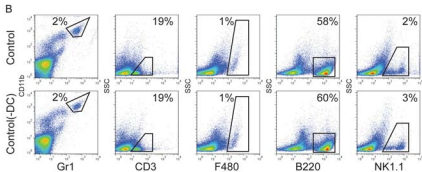

Supplemental Figure 10

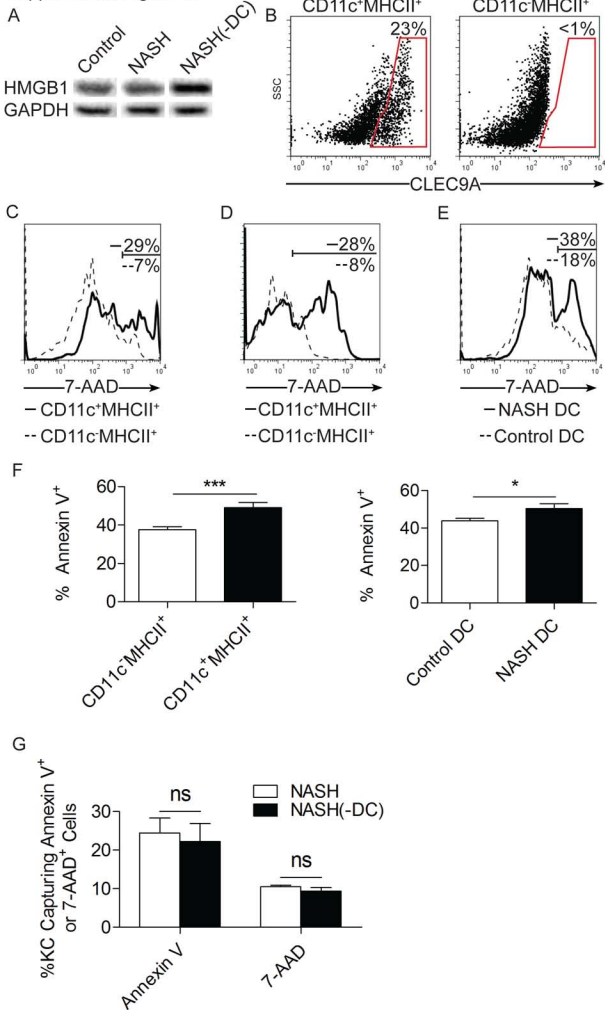

Supplement: NIHMS436339-supplement-Supp_Fig_S1-S10.pdf [file NIHMS436339-supplement-Supp_Fig_S1-S10.pdf]
